# Supplementary material
Source: publisher site journal article supplement (https://www.dovepress.com/article/420386)
Supplement: Supplementary file 1 [file get_supplementary_file.php]

Supplementary Table 1 Annual scientific production and average citations

| Rank | Year | Article | Review | Total | MeanTCperYear |
| --- | --- | --- | --- | --- | --- |
| 1 | 2012 | 2 | 0 | 2 | 0.38 |
| 2 | 2013 | 52 | 11 | 63 | 5.83 |
| 3 | 2014 | 67 | 17 | 84 | 5.42 |
| 4 | 2015 | 72 | 23 | 95 | 4.32 |
| 5 | 2016 | 83 | 21 | 104 | 6.1 |
| 6 | 2017 | 112 | 38 | 150 | 6.23 |
| 7 | 2018 | 109 | 34 | 143 | 7.64 |
| 8 | 2019 | 125 | 47 | 172 | 5.41 |
| 9 | 2020 | 163 | 71 | 234 | 3.85 |
| 10 | 2021 | 197 | 82 | 279 | 2.14 |
| 11 | 2022 | 213 | 74 | 287 | 0.8 |
| 12 | 2023 | 12 | 4 | 16 | 0.25 |

Supplementary Table 2 Scientific production and citations from the top 10 countries

| Rank | Country | Article count | TC | Average Article Citations |
| --- | --- | --- | --- | --- |
| 1 | USA | 1798 | 19603 | 44.25 |
| 2 | China | 558 | 1554 | 10.29 |
| 3 | Germany | 489 | 3100 | 25.83 |
| 4 | France | 396 | 2595 | 23.81 |
| 5 | Japan | 245 | 729 | 10.88 |
| 6 | UK | 235 | 949 | 20.63 |
| 7 | Italy | 226 | 800 | 15.69 |
| 8 | Netherlands | 163 | 801 | 23.56 |
| 9 | South Korea | 144 | 676 | 15.36 |
| 10 | Denmark | 137 | 1258 | 29.95 |
| 11 | Spain | 137 | 444 | 14.32 |

Supplementary Table 3 The top 10 locally cited journals

| Rank | Journal | Citations |
| --- | --- | --- |
| 1 | J INVEST DERMATOL | 3986 |
| 2 | PLOS ONE | 2852 |
| 3 | J ALLERGY CLIN IMMUN | 2770 |
| 4 | NATURE | 2273 |
| 5 | BRIT J DERMATOL | 2256 |
| 6 | SCIENCE | 2042 |
| 7 | P NATL ACAD SCI USA | 1750 |
| 8 | SCI REP-UK | 1223 |
| 9 | J AM ACAD DERMATOL | 1200 |
| 10 | NAT REV MICROBIOL | 1179 |

Supplementary Table 4 The top 10 core authors and influence

| Rank | Author | Article count | h_index | g_index | Total number of citations | Average number of citations |
| --- | --- | --- | --- | --- | --- | --- |
| 1 | Gallo RL | 21 | 18 | 21 | 2311 | 110.05 |
| 2 | Grice EA | 20 | 18 | 20 | 1173 | 58.65 |
| 3 | Kong HH | 19 | 14 | 19 | 2138 | 112.53 |
| 4 | Segre JA | 18 | 14 | 18 | 3159 | 175.50 |
| 5 | Bruggemann H | 16 | 10 | 16 | 554 | 34.63 |
| 6 | Huang CM | 14 | 8 | 14 | 552 | 39.43 |
| 7 | Dreno B | 13 | 11 | 13 | 770 | 59.23 |
| 8 | Horswill AR | 11 | 7 | 11 | 533 | 48.45 |
| 9 | Knight R | 11 | 9 | 11 | 2298 | 208.91 |
| 10 | Chen J | 10 | 4 | 7 | 56 | 5.60 |

Supplementary Table 5 Articles and total citations of the top 10 core authors

| Author | year | TI | SO | DOI | TC | TCpY |
| --- | --- | --- | --- | --- | --- | --- |
| GALLO RL88 | 2017 | Antimicrobials from human skin commensal bacteria protect against staphylococcus aureus and are deficient in atopic dermatitis | SCIENCE TRANSLATIONAL MEDICINE | 10.1126/scitranslmed.aah4680 | 517 | 73.857 |
| KONG HH125 | 2016 | Temporal stability of the human skin microbiome | CELL | 10.1016/j.cell.2016.04.008 | 468 | 58.5 |
| KONG HH37 | 2014 | Biogeography and individuality shape function in the human skin metagenome | NATURE | 10.1038/nature13786 | 580 | 58 |
| SEGRE JA34 | 2018 | The human skin microbiome | NATURE REVIEWS MICROBIOLOGY | 10.1038/nrmicro.2017.157 | 823 | 137.167 |
| SEGRE JA125 | 2016 | Temporal stability of the human skin microbiome | CELL | 10.1016/j.cell.2016.04.008 | 468 | 58.5 |
| SEGRE JA170 | 2014 | Dialogue between skin microbiota and immunity | SCIENCE | 10.1126/science.1260144 | 333 | 33.3 |
| SEGRE JA37 | 2014 | Biogeography and individuality shape function in the human skin metagenome | NATURE | 10.1038/nature13786 | 580 | 58 |
| KNIGHT R33 | 2018 | Current understanding of the human microbiome | NATURE MEDICINE | 10.1038/nm.4517 | 871 | 145.167 |
| KNIGHT R11 | 2014 | Longitudinal analysis of microbial interaction between humans and the indoor environment | SCIENCE | 10.1126/science.1254529 | 541 | 54.1 |
| KNIGHT R10 | 2013 | Cohabiting family members share microbiota with one another and with their dogs | ELIFE | 10.7554/eLife.00458 | 617 | 56.091 |

Supplementary Table 6 The top 100 keywords cluster

| Cluster | Keywords |
| --- | --- |
| 1 | antibiotics、association、cancer、contamination、diagnosis、eczema、efficacy、epidemiology、guidelines、gut、health、human microbiome、hygiene、impact、infections、management、populations、prevalence、prevention、risk、severity、surgical site infection、therapy、transmission |
| 2 | activation、antimicrobial peptides、barrier function、cells、colonization、dendritic cells、dermatitis、disease、epidermidis、expression、filaggrin、immune-responses、immunity、induction、inflammation、keratinocytes、mechanisms、mutations、receptor、skin barrier、staphylococcus aureus、stratum-corneum、t-cells |
| 3 | 16s rrna、bacteria、bacterial communities、communities、culture、dandruff、diversity、dna、fungal、host、identification、malassezia、metagenomics、microbiome、molecular analysis、psoriasis、seborrheic dermatitis、sequences、skin、skin microbiome、surface、wound healing |
| 4 | acne、acne vulgaris、biofilm、coagulase-negative staphylococci、commensal、cutibacterium acnes、gene、human keratinocytes、in-vitro、pathogenesis、propionibacterium、propionibacterium acnes、resistance、staphylococcus epidermidis、strains、toll-like receptors、virulence、vulgaris |
| 5 | asthma、atopic dermatitis、body habitats、chain fatty-acids、children、commensal bacteria、double-blind、dysbiosis、food allergy、gut microbiota、intestinal microbiota、probiotics、regulatory t-cells |

Supplementary Table 7 Top10 locally cited documents

| Rank | Title | First Author | Year | Journal | Local Citations | Global Citations | LC/GC Ratio (%) |
| --- | --- | --- | --- | --- | --- | --- | --- |
| 1 | The human skin microbiome34 | BYRD AL | 2018 | NAT REV MICROBIOL | 248 | 823 | 30.13 |
| 2 | Biogeography and individuality shape function in the human skin metagenome37 | OH J | 2014 | NATURE | 209 | 580 | 36.03 |
| 3 | Temporal Stability of the Human Skin Microbiome125 | OH J | 2016 | CELL | 196 | 468 | 41.88 |
| 4 | Antimicrobials from human skin commensal bacteria protect against Staphylococcus aureus and are deficient in atopic dermatitis88 | NAKATSUJI T | 2017 | SCI TRANSL MED | 195 | 517 | 37.72 |
| 5 | Propionibacterium acnes strain populations in the human skin microbiome associated with acne80 | FITZ-GIBBON S | 2013 | J INVEST DERMATOL | 178 | 380 | 46.84 |
| 6 | Dialogue between skin microbiota and immunity170 | BELKAID Y | 2014 | SCIENCE | 130 | 333 | 39.04 |
| 7 | Staphylococcus aureus and Staphylococcus epidermidis strain diversity underlying pediatric atopic dermatitis138 | BYRD AL | 2017 | SCI TRANSL MED | 116 | 259 | 44.79 |
| 8 | Functions of the skin microbiota in health and disease131 | SANFORD JA | 2013 | SEMIN IMMUNOL | 111 | 251 | 44.22 |
| 9 | Skin microbiota-host interactions141 | CHEN YE | 2018 | NATURE | 105 | 283 | 37.1 |
| 10 | Skin Microbiome Surveys Are Strongly Influenced by Experimental Design140 | MEISEL JS | 2016 | J INVEST DERMATOL | 99 | 181 | 54.7 |

Supplementary Table 8 Historiograph

| Rank | Title | First Author | Year | Journal | LCS | GCS |
| --- | --- | --- | --- | --- | --- | --- |
| 1 | Structure and function of the human skin microbiome130 | SCHOMMER NN | 2013 | TRENDS MICROBIOL | 89 | 205 |
| 2 | Cohabiting family members share microbiota with one another and with their dogs10 | SONG SJ | 2013 | ELIFE | 55 | 617 |
| 3 | Propionibacterium acnes strain populations in the human skin microbiome associated with acne80 | FITZ-GIBBON S | 2013 | J INVEST DERMATOL | 178 | 380 |
| 4 | Fermentation of propionibacterium acnes, a Commensal bacterium in the human skin microbiome, as skin probiotics against methicillin-resistant staphylococcus aureus134 | SHU MY | 2013 | PLOS ONE | 72 | 168 |
| 5 | The altered landscape of the human skin microbiome in patients with primary immunodeficiencies129 | OH J | 2013 | GENOME RES | 85 | 173 |
| 6 | Functions of the skin microbiota in health and disease131 | SANFORD JA | 2013 | SEMIN IMMUNOL | 111 | 251 |
| 7 | Staphylococcus epidermidis in the human skin microbiome mediates fermentation to inhibit the growth of propionibacterium acnes: implications of probiotics in acne vulgaris5 | WANG YH | 2014 | APPL MICROBIOL BIOT | 78 | 240 |
| 8 | Bacterial skin commensals and their role as host guardians135 | CHRISTENSEN GJM | 2014 | BENEF MICROBES | 73 | 164 |
| 9 | Dialogue between skin microbiota and immunity170 | BELKAID Y | 2014 | SCIENCE | 130 | 333 |
| 10 | Biogeography and individuality shape function in the human skin metagenome37 | OH J | 2014 | NATURE | 209 | 580 |
| 11 | Skin microbiome surveys are strongly influenced by experimental design140 | MEISEL JS | 2016 | J INVEST DERMATOL | 99 | 181 |
| 12 | The balance of metagenomic elements shapes the skin microbiome in acne and health142 | BARNARD E | 2016 | SCI REP-UK | 68 | 101 |
| 13 | Temporal stability of the human skin microbiome125 | OH J | 2016 | CELL | 196 | 468 |
| 14 | Skin microbiome before development of atopic dermatitis: early colonization with commensal staphylococci at 2 months is associated with a lower risk of atopic dermatitis at 1 year136 | KENNEDY EA | 2017 | J ALLERGY CLIN IMMUN | 93 | 189 |
| 15 | Performing skin microbiome research: a method to the madness139 | KONG HH | 2017 | J INVEST DERMATOL | 60 | 109 |
| 16 | Antimicrobials from human skin commensal bacteria protect against staphylococcus aureus and are deficient in atopic dermatitis88 | NAKATSUJI T | 2017 | SCI TRANSL MED | 195 | 517 |
| 17 | Staphylococcus aureus and staphylococcus epidermidis strain diversity underlying pediatric atopic dermatitis138 | BYRD AL | 2017 | SCI TRANSL MED | 116 | 259 |
| 18 | Skin microbiota-host interactions141 | CHEN YE | 2018 | NATURE | 105 | 283 |
| 19 | The human skin microbiome34 | BYRD AL | 2018 | NAT REV MICROBIOL | 248 | 823 |
| 20 | The microbiome in patients with atopic dermatitis137 | PALLER AS | 2019 | J ALLERGY CLIN IMMUN | 66 | 174 |
